# Supplementary material for: Renal tubular peroxisomes are dispensable for normal kidney function
Source: PubMed Central journal article supplement (PMC8876468; doi:10.1172/jci.insight.155836), 2022-02-22
Supplement: jciinsight-7-155836-s069.pdf [file jciinsight-7-155836-s069.pdf]

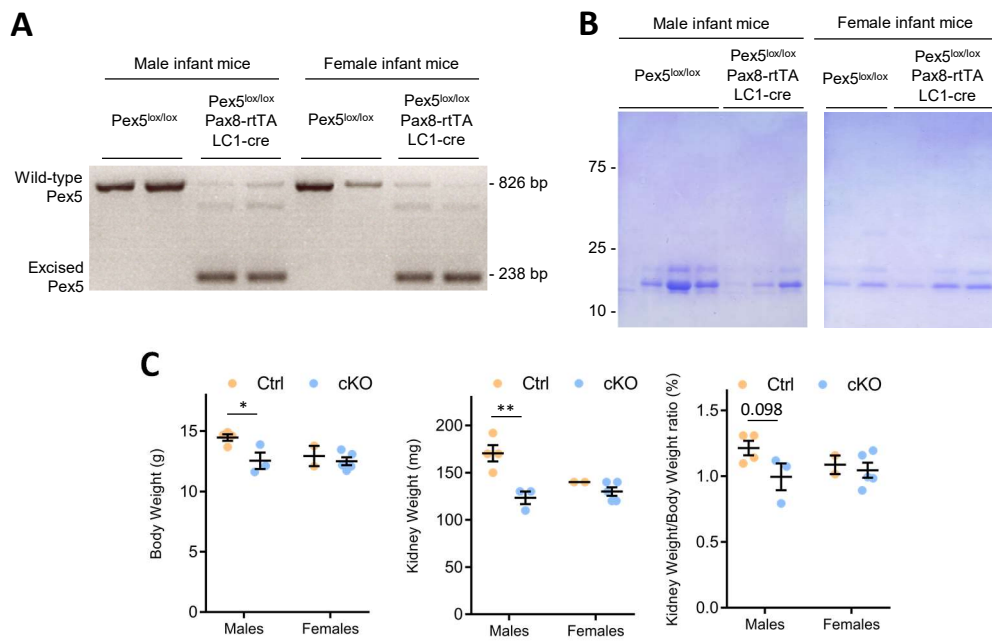

Fig supp. 1

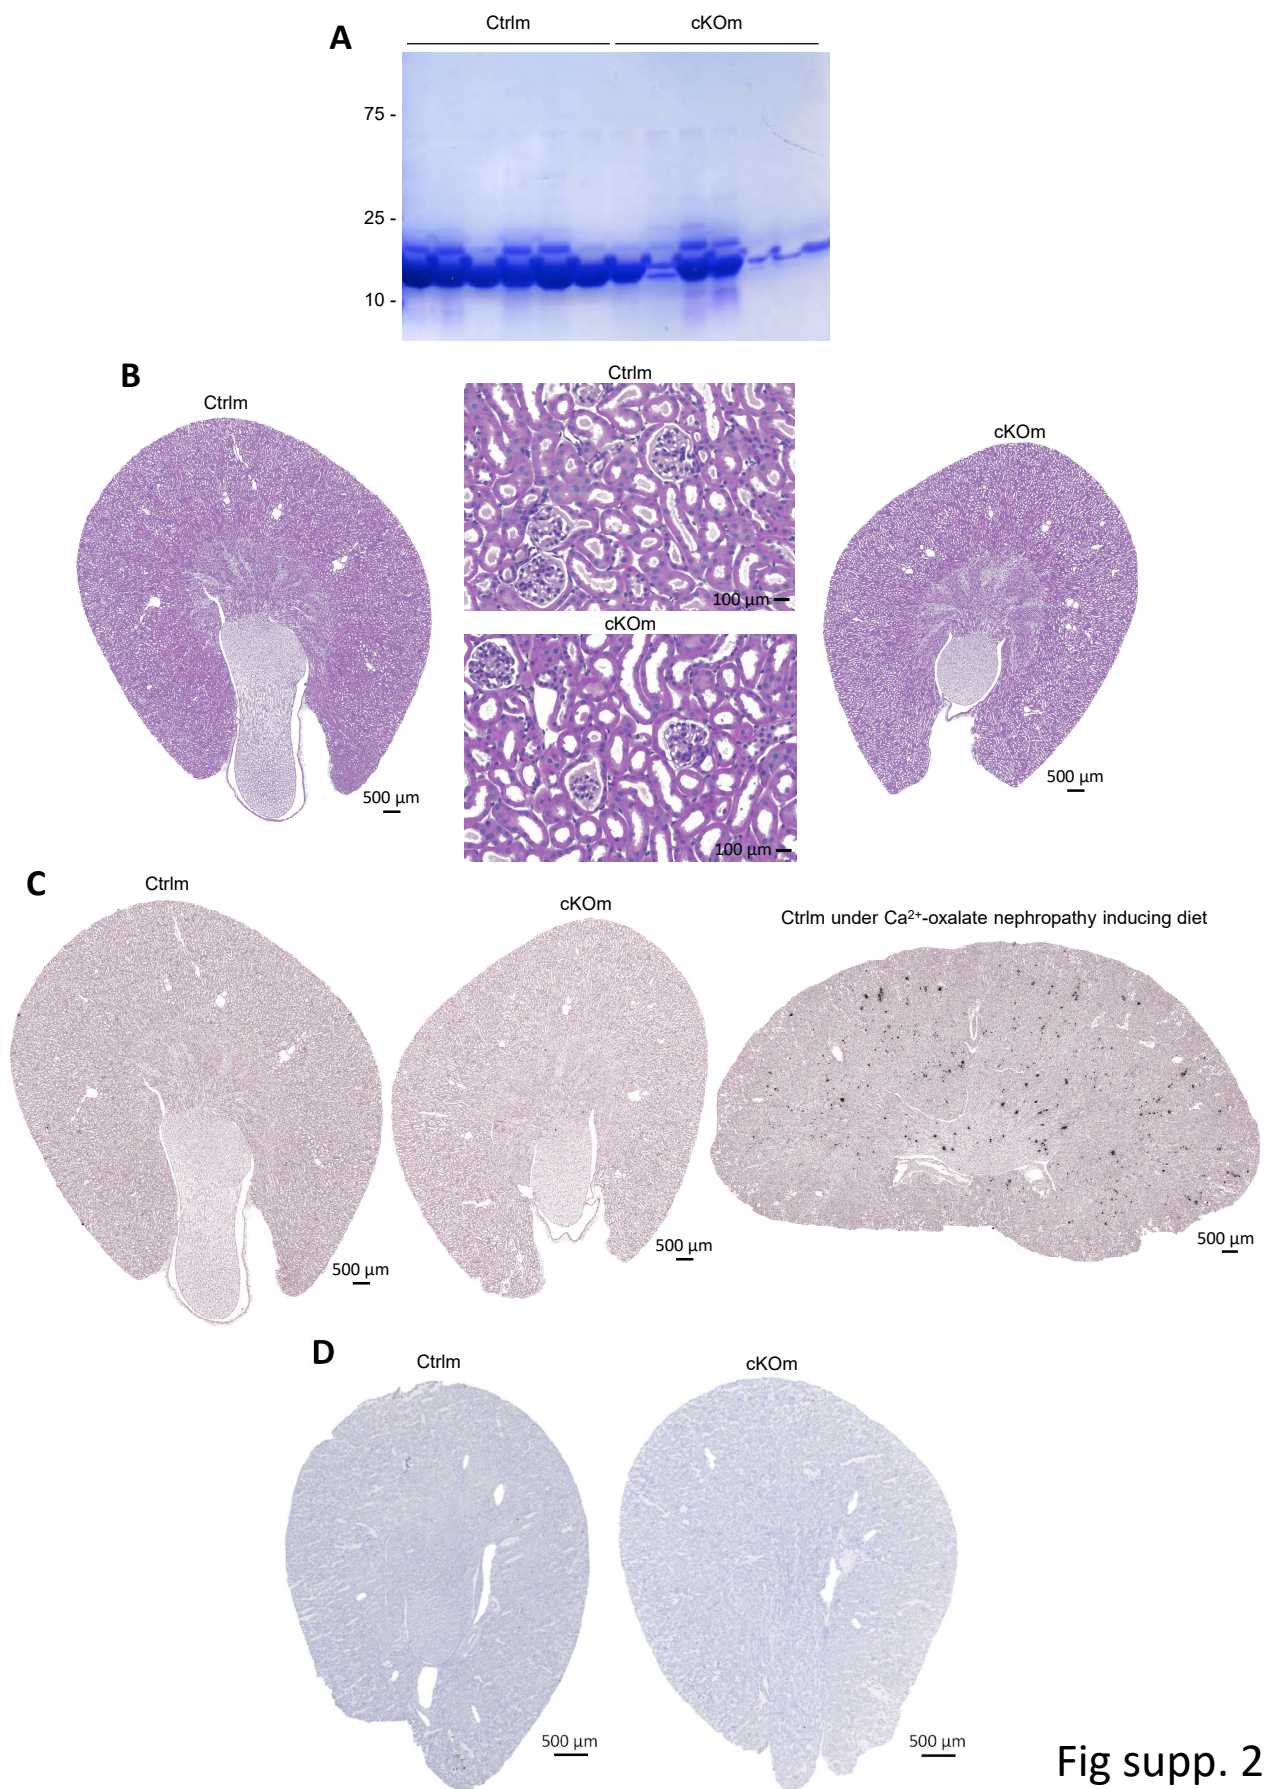

Fig supp. 2

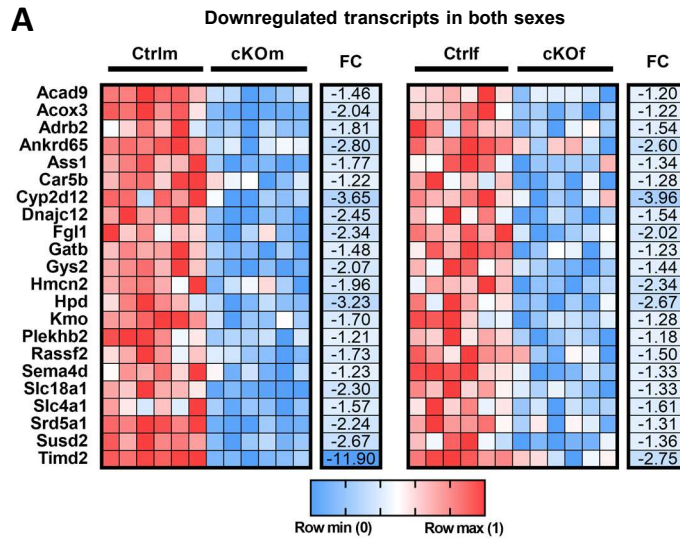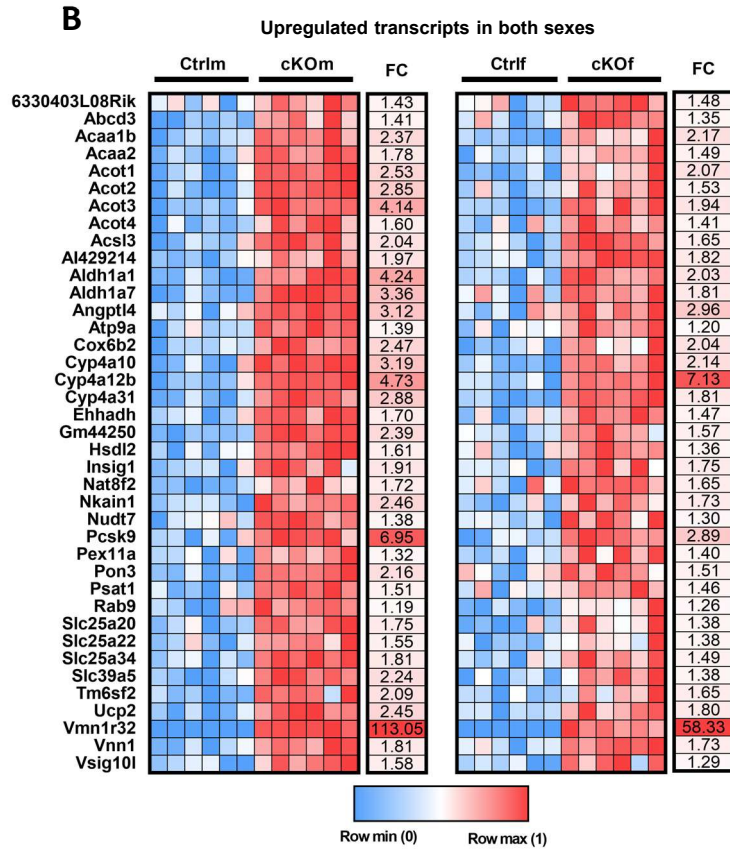

Fig supp. 3



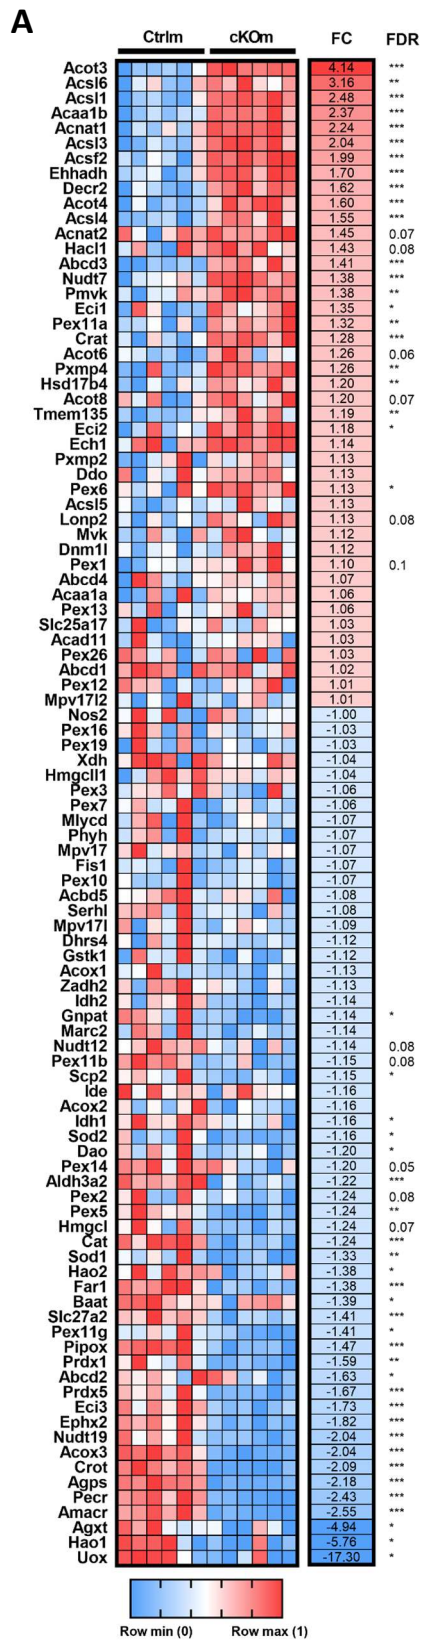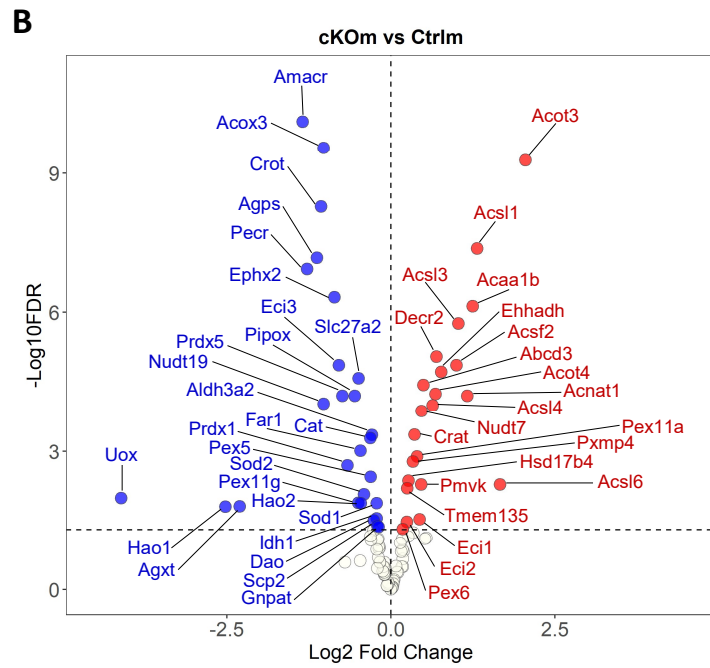

Fig supp. 4

**A** Glyoxylate and Dicarboxylate metabolism:  
NES=-1.98 p-value=0.002 p.adjust=0.037

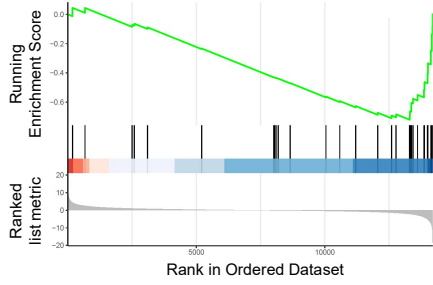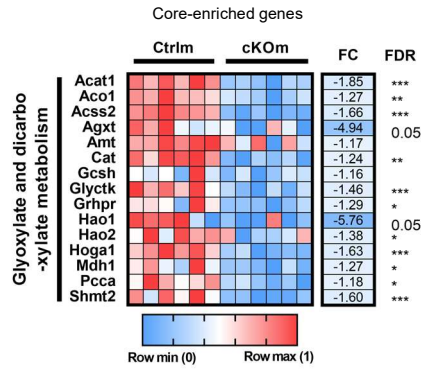

**B** Pyruvate metabolism:  
NES=-2.209 p-value=0.002 p.adjust=0.037

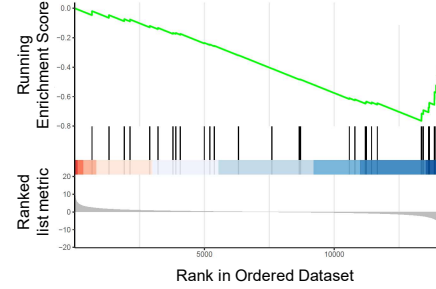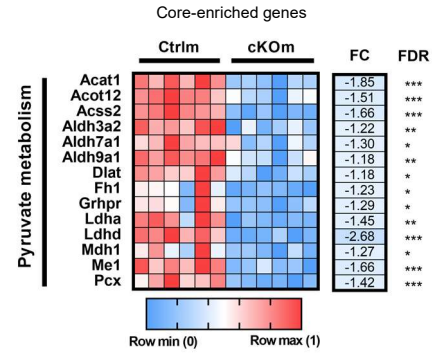

**C** Glutathione metabolism :  
NES=-1.746 p-value=0.004 p.adjust=0.042

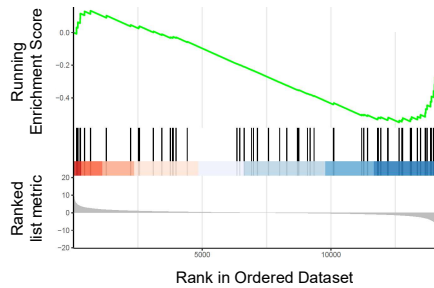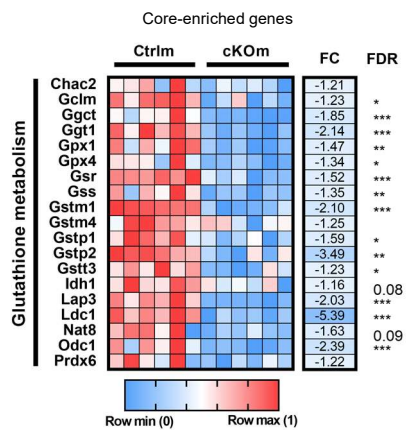

**D** Tryptophan metabolism:  
NES=-1.795 p-value=0.004 p.adjust=0.051

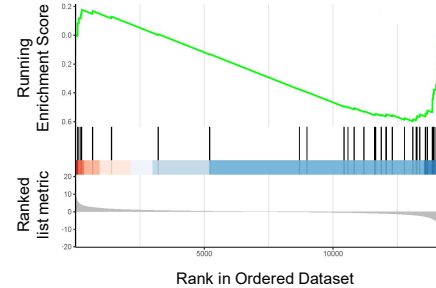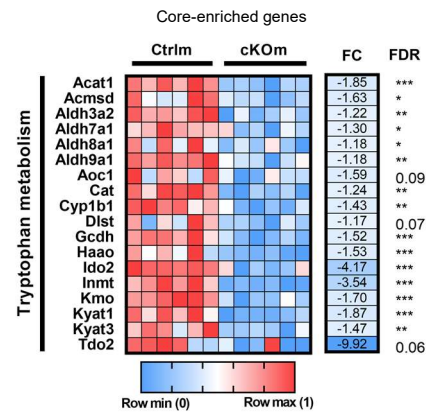

Fig supp. 5

**A** Biosynthesis of unsaturated fatty acids:  
NES=+1.8876 p-value=0.004 p.adjust=0.042

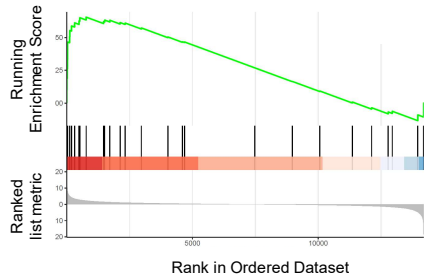

Core-enriched genes

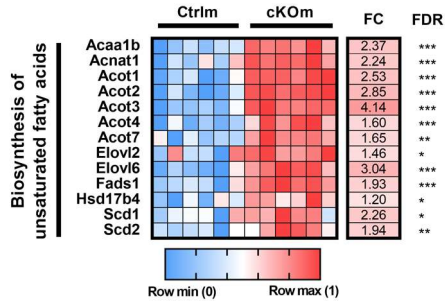

**B** Fatty acid metabolism:  
NES=+1.614 p-value=0.01 p.adjust=0.101

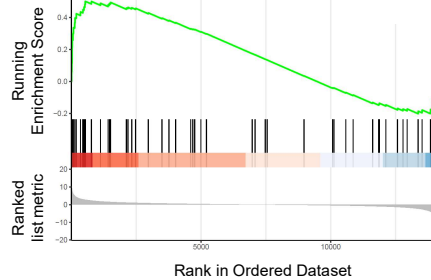

Core-enriched genes

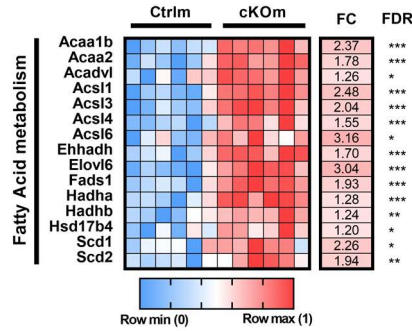

**C** PPAR Signaling pathway:  
NES=+1.63 p-value=0.009 p.adjust=0.0985

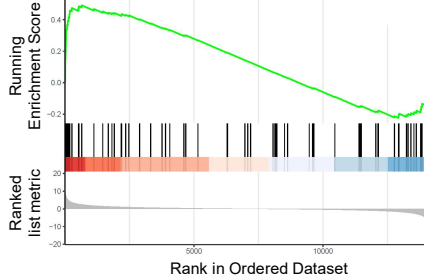

Core-enriched genes

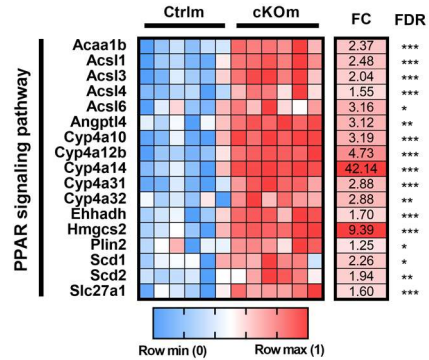

**D** ABC transporters:  
NES=+1.669 p-value=0.015 p.adjust=0.117

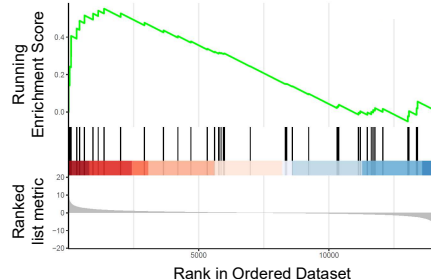

Core-enriched genes

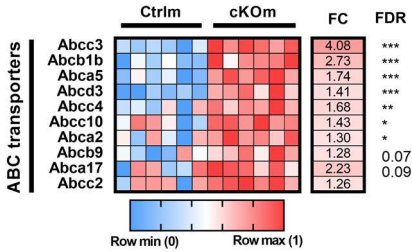

Fig supp. 6

**A**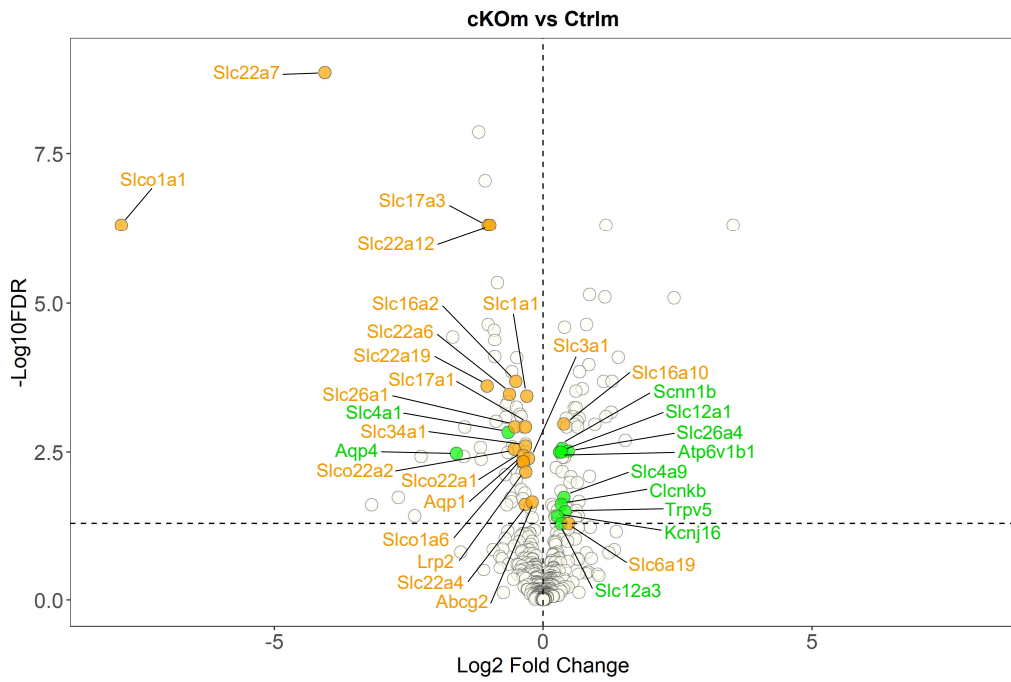**B**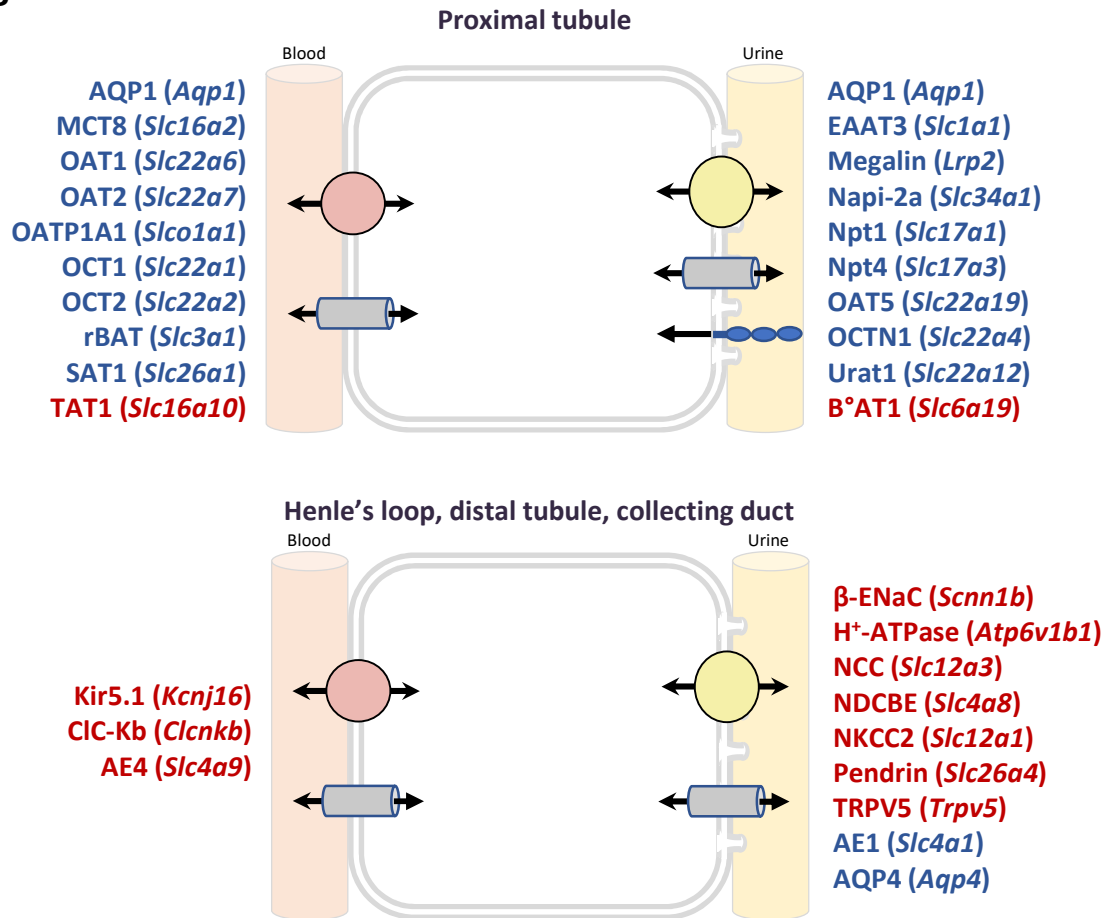

Fig supp. 7

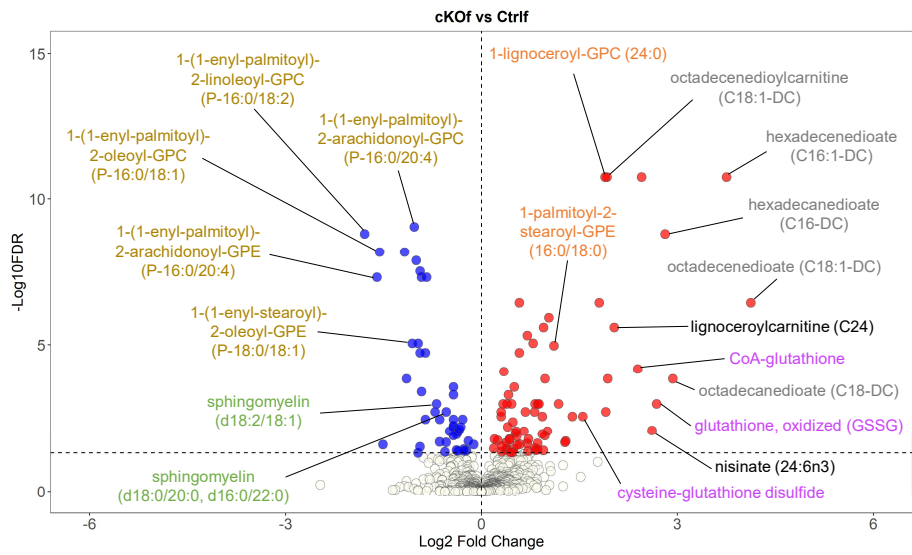

Fig supp. 8



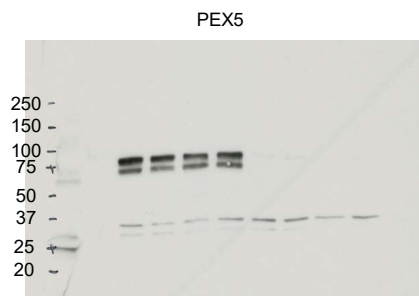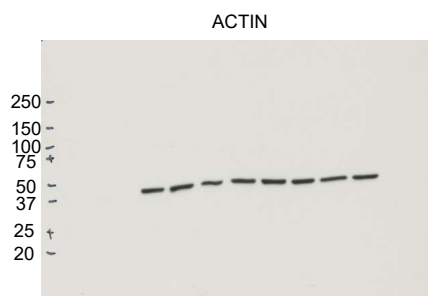

Figure 1B  
Upper panel

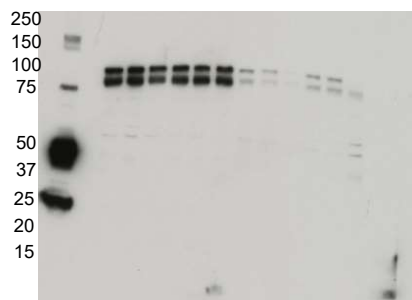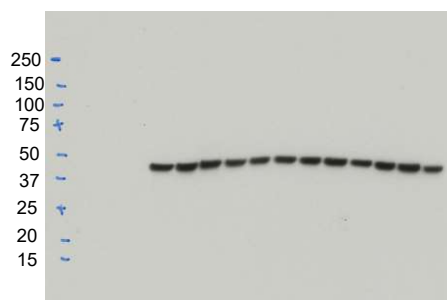

Figure 1B  
Middle panel

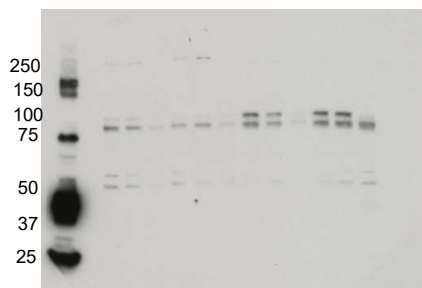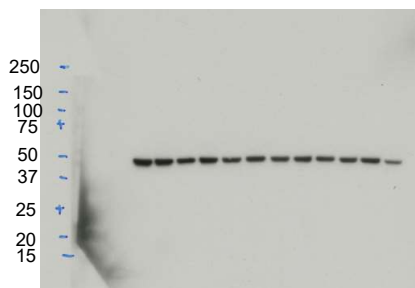

Figure 1B  
Lower panel
